# Supplementary material for: Neutrophil Extracellular DNA Traps Induce Autoantigen Production by Airway Epithelial Cells
Source: PubMed Central journal article supplement (PMC5603142; doi:10.1155/2017/5675029), 2017-08-30
Supplement: 5675029.f1.pdf [file 5675029.f1.pdf]

## Supplementary Information

### Neutrophil extracellular DNA traps induce autoantigen production by airway epithelial cells

Youngwoo Choi, PhD,<sup>1\*</sup> Duy Le Pham, MD, PhD,<sup>1,2,4\*</sup> Dong-Hyun Lee, MS,<sup>2</sup> Ga-Young Ban, MD, PhD,<sup>1</sup> Ji-Ho Lee, MD,<sup>1</sup> Seung-Hyun Kim, PhD,<sup>3</sup> Hae-Sim Park, MD, PhD<sup>1,2,3</sup>

<sup>1</sup>Department of Allergy and Clinical Immunology; <sup>2</sup>Department of Biomedical Sciences; <sup>3</sup>Clinical Trial Center, Ajou University Medical Center, Suwon, South Korea; <sup>4</sup>Medicine Faculty, University of Medicine and Pharmacy, Ho Chi Minh city, Viet Nam.

\*These authors contributed equally to this work.

Corresponding author: Professor Hae-Sim Park, MD, PhD

Supplementary Table. Demographic data of the study subjects.

|                        | HC (n=3)     | NSA (n=3)       | SA (n=3)        |
|------------------------|--------------|-----------------|-----------------|
| Age (y)                | 31.00 ± 4.36 | 53.55 ± 22.03   | 60.00 ± 7.81    |
| Female sex (%)         | 100.00       | 66.67           | 66.67           |
| Atopy (%)              | 66.67        | 100.00          | 66.67           |
| FEV <sub>1</sub> (%)   | NA           | 95.23 ± 15.34   | 69.87 ± 15.87   |
| TEC (/μL)              | NA           | 196.67 ± 158.85 | 643.74 ± 371.67 |
| Serum IgE (kU/L)       | NA           | 129.67 ± 68.30  | 220.67 ± 170.41 |
| Sputum neutrophils (%) | NA           | 44.00 ± 57.98   | 69.67 ± 27.39   |

FEV<sub>1</sub>, forced expiratory volume in 1 s; TEC, total eosinophil count; IgE, immunoglobulin E; NA, not applicable.
